# Supplementary material for: Long-Term Maintenance of Sinus Rhythm Is Associated with Favorable Echocardiographic Remodeling and Improved Clinical Outcomes after Transcatheter Aortic Valve Replacement
Source: MDPI journal article supplement (doi:10.3390/jcm11051330), 2022-02-28
Supplement: s1 [file s1]

**Table S1.** The primary and the secondary endpoints according to rhythm status in different types of periprocedural AF

|                                    | Pre-existing AF |                          |          | NOAF            |                          |          |
|------------------------------------|-----------------|--------------------------|----------|-----------------|--------------------------|----------|
|                                    | SRM<br>(N = 19) | AF sustained<br>(N = 33) | <i>p</i> | SRM<br>(N = 24) | AF sustained<br>(N = 11) | <i>p</i> |
| Death, stroke or rehospitalization | 3 (15.8%)       | 8 (24.2%)                | 0.312    | 2 (8.3%)        | 8 (72.7%)                | 0.002    |
| All cause death                    | 3 (15.8%)       | 3 (9.1%)                 | 0.610    | 1 (4.2%)        | 4 (36.4%)                | 0.049    |
| Cardiovascular death               | 1 (5.3%)        | 2 (6.1%)                 | 0.827    | 1 (4.2%)        | 3 (27.3%)                | 0.104    |
| HF rehospitalization               | 0               | 6 (18.2%)                | 0.127    | 0               | 4 (36.4%)                | 0.010    |
| Stroke                             | 0               | 0                        | NS       | 1 (4.2%)        | 0                        | NS       |
| Major bleeding                     | 1 (5.3%)        | 4 (12.1%)                | 0.383    | 1 (4.2%)        | 1 (9.1%)                 | 0.419    |

*p*-values were calculated using univariate Cox-regression analysis. *p* <0.05 indicates statistical significance.

AF = atrial fibrillation; NOAF = new onset atrial fibrillation; SRM = sinus rhythm maintained; HF = heart failure.

**Table S2.** Predictors for long-term sinus rhythm maintenance in patients with periprocedural AF.

| Variable                                     | Crude HR | 95% CI        | <i>p</i> | Adjusted HR | 95% CI        | <i>p</i> |
|----------------------------------------------|----------|---------------|----------|-------------|---------------|----------|
| Age                                          | 1.021    | 0.953–1.094   | 0.582    | 1.013       | 0.890–1.137   | 0.931    |
| Male sex                                     | 1.385    | 0.592–3.224   | 0.457    | 2.118       | 0.475–9.526   | 0.333    |
| LVEF < 50%                                   | 0.913    | 0.341–2.436   | 0.849    | 2.212       | 0.432–11.455  | 0.344    |
| BMI                                          | 1.012    | 0.918–1.127   | 0.891    |             |               |          |
| Balloon-expandable device                    | 0.301    | 0.126–0.734   | 0.008    | 0.964       | 0.242–3.905   | 0.952    |
| Hypertension                                 | 0.860    | 0.321–2.292   | 0.755    |             |               |          |
| Diabetes                                     | 0.785    | 0.322–1.937   | 0.594    |             |               |          |
| Stroke                                       | 0.895    | 0.324–2.573   | 0.827    |             |               |          |
| Prior MI                                     | 0.866    | 0.261–2.790   | 0.798    |             |               |          |
| Anti-arrhythmic drug                         | 1.410    | 0.584–3.462   | 0.449    | 1.107       | 0.285–4.284   | 0.892    |
| CKD                                          | 0.558    | 0.226–1.494   | 0.236    | 1.451       | 0.292–7.283   | 0.648    |
| CHA <sub>2</sub> DS <sub>2</sub> -Vasc score | 0.981    | 0.750–1.273   | 0.861    |             |               |          |
| Paroxysmal type                              | 28.576   | 7.533–108.429 | <0.001   | 24.913      | 4.116–150.882 | <0.001   |
| LAVI < 46 ml/m <sup>2</sup>                  | 14.874   | 3.861–57.252  | <0.001   | 13.320      | 2.281–77.694  | 0.004    |

HR and p-value were calculated using univariate and multivariate logistic regression analysis. P <0.05 indicates statistical significance. AF = atrial fibrillation; HR = hazard ratio; CI = confidence interval; LVEF = left ventricular ejection fraction; BMI = body mass index; MI = myocardial infarction; CKD = chronic kidney disease; LAVI = left atrial volume index
